1  
2  
3  
4  
5  
6  
7  
8  
9  
10  
11  
12  
13  
14  
15  
16  
17  
18  
19  
20  
21  
22  
23  
24  
25  
26  
27  
28  
29  
30  
31  
32  
33  
34  
35  
36  
37  
38  
39  
40  
41  
42

Long weekend sleep is linked to stronger academic performance  
in male but not female pharmacy students

**Rehana Khan Leak, PhD**

Graduate School of Pharmaceutical Sciences  
School of Pharmacy, Duquesne University  
Pittsburgh, PA 15282  
Address correspondence to [leakr@duq.edu](mailto:leakr@duq.edu)

**Susan L. Weiner, BA**

Graduate School of Pharmaceutical Sciences  
School of Pharmacy, Duquesne University  
Pittsburgh, PA 15282

**Manisha N. Chandwani, BPharm**

Graduate School of Pharmaceutical Sciences  
School of Pharmacy, Duquesne University  
Pittsburgh, PA 15282

**Diane C. Rhodes, BS Pharm**

School of Pharmacy, Duquesne University  
Pittsburgh, PA 15282

## LONG WEEKEND SLEEP AND ACADEMIC PERFORMANCE

### 43 **Abstract**

44

45 **Introduction.** Poor sleep hygiene portends loss of physical and mental stamina. Therefore,  
46 maintaining a regular sleep/wake schedule on both weekdays and weekends is highly  
47 recommended. However, this advice runs contrary to the habits of university students, who may  
48 only experience recovery sleep if they “sleep in” on weekends. Pharmacy students at Duquesne  
49 sit for frequent examinations, typically commencing at 7:30 AM, and they complain about  
50 fatigue. Thus, we tested the hypothesis that longer sleep durations on both weekdays and  
51 weekends are linked to stronger academic performance.

52 **Methods.** Students in their third year at Duquesne University were administered three surveys to  
53 collect daily data on sleep habits and factors that might influence sleep quality, such as having  
54 roommates, long commute times, and sleep interruptions. GPAs were collected from the Dean’s  
55 office, with permission from the students.

56 **Results.** Longer weekend—but not weekday—sleep durations were significantly correlated with  
57 higher GPAs in men and not in women. Women achieved slightly higher cumulative GPAs than  
58 men. Students who fell asleep within 15 minutes of going to bed had higher GPAs than those  
59 who fell asleep after an hour or more.

60 **Conclusion.** The present observations do not establish causal links, but, given the body of prior  
61 evidence on the salutary properties of sleep, men in this cohort may have reaped benefit from  
62 recovery sleep on weekends. Rather than recommending that students force themselves awake on  
63 weekends in an attempt to maintain a consistent sleep routine, the real-life habits of students  
64 should be considered.

65 **Keywords:** academic performance, gender, grade point average, grades, sleep

## 66 Introduction

67

68 *“Sleep . . . Balm of hurt minds . . . Chief nourisher in life’s feast.”*

69 Macbeth (2.2.46-51) by William Shakespeare

70

71 During the sleep phase of the activity/rest rhythm, the glymphatic system of the mammalian  
72 brain performs its janitorial duties and clears the accumulated metabolites via the cerebrospinal  
73 fluid.<sup>1-3</sup> Sleep deprivation studies further suggest that sleep loss-induced attentional deficits are  
74 preceded by electrophysiological lapses in neuronal function, and that the association between  
75 sleep loss and cognitive impairment is causal.<sup>4-10</sup> Thus, sleep is linked to superior memory  
76 consolidation and academic performance,<sup>11-13</sup> including in students enrolled in Pharmacy  
77 programs.<sup>14</sup>

78 In the Pharmacy program at Duquesne University, exams are administered at 7:30 AM in the  
79 morning (6:30 or 7:00 AM for special needs students), and classes commence at 8:00 AM.  
80 Despite the need for early-morning awakenings and awareness of the benefits of good sleep  
81 hygiene, anecdotal comments from Pharmacy students suggest that they often stay up late at  
82 night, cramming for the 7:30 AM examinations, and then “crash” on weekends by oversleeping.  
83 Thus, the central hypothesis was that longer sleep durations and consistent sleep habits would be  
84 associated with better academic performance in first-year pharmacy students.

## 85 **Methods**

86

87 **Study Design:** Ethics approval for three surveys was granted by the Institutional Review Board  
88 at Duquesne University. First, a homework assignment was administered in the Ability Based  
89 Laboratory Experience (ABLE) course at Duquesne University. Students register for this course  
90 in the second semester of Year 1 of the four-year professional phase, after completion of the two-  
91 year preprofessional phase. Out of 152 enrolled students, all completed the daily online Survey 1  
92 (**Appendix 1**) to record bedtimes, sleep times, and awakenings for three consecutive weeks mid-  
93 semester. Survey 2 was voluntary. In Survey 2, demographic information and permission to  
94 publish the data from Survey 1 (on a separate page from demographic data) were collected from  
95 125 students (**Appendix 2**).

96

97 A third, voluntary survey was deployed two months later to the same student body in their  
98 Continuous Professional Development course, to continue to assess additional lifestyle factors  
99 hypothesized to impact sleep quality and academic performance, such as participation on an  
100 athletic team, nap frequency and duration, hours spent working at a job, *etc.* (**Appendix 3**). One-  
101 hundred and twenty-five students participated in the latter survey. In Survey 3, permission was  
102 collected to acquire individual grade-point averages (GPAs) from the Dean's office. Students  
103 could refuse to have their data analyzed and published at any time. Data were deidentified to  
104 protect the students' anonymity.

105

106 **Statistics:** Data were analyzed in GraphPad Prism (Prism 8 for MacOS) and subjected to Prism's  
107 default tests for heteroscedasticity (Bartlett's, Brown-Forsythe, and Spearman's test) and

## LONG WEEKEND SLEEP AND ACADEMIC PERFORMANCE

108 normality (Anderson-Darling, D'Agostino-Pearson omnibus, Shapiro-Wilk, and Kolmogorov-  
109 Smirnov tests). When parametric assumptions were met, Pearson correlations, Student *t* tests, or  
110 ANOVAs were performed on data sets. Bonferroni *post hoc* tests were used for multiple  
111 comparisons after the appropriate ANOVA. For non-Gaussian data sets, the Kruskal-Wallis test  
112 was followed by the Dunn's *post hoc* correction for multiple comparisons. Alpha was set at 0.05  
113 (two-tailed).

114

115 **Inclusion/Exclusion Criteria:** Data were included in the analyses and graphs only if the student  
116 granted permission. Data were excluded only if the student did not grant permission, or failed to  
117 complete that specific part of the survey (*i.e.*, some students did not answer every single question  
118 on each survey). Therefore, the number of students per group were added to every figure. No  
119 outliers were removed.

## 120 **Results**

121 Demographic data and a frequency histogram of GPAs are illustrated in **Figure 1**. The majority  
122 of participants were women, 21 years of age, not part of an athletic team, and had not transferred  
123 from another school to Duquesne University. More women commuted than men, but among the  
124 women, a larger percentage lived on campus.

125 Weekend sleep duration was significantly associated with cumulative GPAs collected from the  
126 Dean's office (**Figure 2A**; one-way ANOVA;  $F(4, 107) = 2.621$ ;  $p = 0.0389$ ; passed  
127 heteroscedasticity and normality tests). Students who slept 10 or more hours per weekend night  
128 had significantly higher cumulative GPAs than students who slept 6 hours per weekend night.  
129 Weekday sleep was not significantly associated with GPAs. Women had slightly higher GPAs  
130 than men (**Figure 2B**; two-tailed  $t$  test;  $t = 2.418$ ;  $df = 118$ ;  $p = 0.0171$ ; passed heteroscedasticity  
131 and normality tests). Thus, the impacts of gender and weekend sleep duration on GPAs were  
132 analyzed by two-way ANOVA (**Figure 2C**; passed heteroscedasticity and normality tests). A  
133 significant interaction between gender and hours of sleep on the weekend was observed ( $p =$   
134  $0.0235$ ,  $F(4, 102) = 2.954$ ), as well as a significant effect of weekend sleep duration ( $p = 0.0059$ ;  
135  $F(4, 102) = 3.851$ ). However, Bonferroni *post hoc* comparisons revealed that the potential  
136 impacts of longer weekend sleep durations were observed in men and not women (**Figure 2C**).  
137 Therefore, correlation analyses between weekend sleep and GPAs were plotted separately for  
138 men and women. These latter analyses confirmed a significant correlation between weekend  
139 sleep duration and GPA for men, but not women (**Figure 2D-E**; passed normality tests). In  
140 contrast, weekday sleep duration was not associated with GPA in men (Pearson  $r = 0.1468$ ; two-  
141 tailed  $p = 0.3661$ ) or women (Pearson  $r = 0.1772$ ; two-tailed  $p = 0.1183$ ).

## LONG WEEKEND SLEEP AND ACADEMIC PERFORMANCE

142 The average standard deviation in sleep duration for each student across the survey period  
143 (adapted from Okano *et al.* as “inconsistency in sleep duration from day to day”<sup>11</sup>) did not differ  
144 between men and women (**Figure 2F**; passed heteroscedasticity but failed normality tests; Mann-  
145 Whitney U statistic 1588; two-tailed  $p = 0.7788$ ) and was not correlated with GPA (not shown).  
146 Other notable measures were not statistically significantly related to GPAs, including the number  
147 and duration of naps, sleep interruptions, and the number of hours of job-related work per week.  
148 GPAs were also not significantly associated with commute duration. One exception was that the  
149 number of minutes to fall asleep after entering bed was significantly associated with GPAs from  
150 the professional phase, in a U-shaped pattern (**Figure 2G**; one-way ANOVA;  $F(4, 116) = 2.763$ ;  
151  $p = 0.0308$ ; passed heteroscedasticity and normality tests). Subjects who fell asleep within 15  
152 minutes, on average, had significantly higher professional GPAs than those who needed one or  
153 more hours. This advantage, however, was not observed in those who reported falling asleep  
154 immediately upon entering bed.

## 155 **Discussion**

156 The main finding of the present study is that weekend sleep duration explained a significant  
157 proportion of the variance in the GPAs of men, but not women. Our students diverge from other  
158 studies in that we failed to observe a correlation between academic performance and weekday  
159 sleep duration,<sup>11, 14</sup> perhaps due to early exam schedules, combined with a high frequency of  
160 assignments and exams (four exams/semester for multiple courses). Given the lack of significant  
161 correlations between academic performance and weekday sleep durations, our central hypothesis  
162 was only partially supported. However, it should be noted that the other studies did not  
163 distinguish weekday from weekend sleep, and that the Zeek *et al.* study did not report the impact  
164 of gender.<sup>14</sup>

165  
166 Given the collective findings, we speculate that men enrolled in our program may benefit from  
167 sleeping longer on the weekend, although it seems reasonable to recommend that both sexes  
168 catch up on lost sleep whenever weekday schedules are particularly hectic. It is known that  
169 women outperform men in academics, and they may enjoy a greater cognitive buffer against the  
170 negative sequelae of sleep loss.<sup>15</sup> In contrast to previous studies,<sup>11</sup> we did not observe higher  
171 sleep inconsistency in men compared to women. Thus, gender differences in academic  
172 performance in our student cohort are not readily explained by differences in sleep inconsistency.

173  
174 The second main finding of the present study is the U-shaped graph of GPAs plotted as a  
175 function of the reported time to fall asleep. Taking one hour or more to fall asleep was associated  
176 with lower professional-phase GPAs than for those who required, on average, 15 minutes. Those  
177 who fell asleep as soon as their heads hit the pillow enjoyed no such advantage. These



## LONG WEEKEND SLEEP AND ACADEMIC PERFORMANCE

178 observations suggest that additional information on sleep-delaying factors, such as blue light  
179 exposure from electronic devices and anxiety-related insomnia, should be investigated in this  
180 cohort, particularly during the professional phase.

181

182 The major limitation of the current study was the reliance on self-reported survey data to assess  
183 sleep duration (due to financial constraints), rather than more expensive methods such as  
184 heartrate/activity-based sleep monitors (*e.g.*, Fitbits) or electroencephalograms. On the other  
185 hand, sleep data were collected on a daily basis for three weeks, and are therefore independent of  
186 lapses in long-term memory recall, which can compromise survey data integrity.

187

### 188 **Conclusion**

189 Based on the current findings and a large body of sleep literature, we speculate that setting an  
190 early alarm on weekends in an effort to maintain the same sleep schedule as during the week  
191 may be counterproductive, especially in male students enrolled in academic programs with early-  
192 morning examinations or classes.

## 193 **Acknowledgements**

194 RKL conceived the study, wrote the paper, interpreted and analyzed data, and constructed  
195 figures. SLW entered and analyzed all the data, constructed figures, and contributed to  
196 experimental design, interpretation, and manuscript editing. MNC contributed to experimental  
197 design, collected survey data, and edited the manuscript. DCR contributed to experimental  
198 design and interpretation and edited the manuscript. We are indebted to the School of Pharmacy  
199 for their generous support of Dr. Leak's lectures on the epidemiology and biological impact of  
200 sleep. We are also grateful to the Duquesne pharmacy students, for their kind participation. The  
201 authors have no conflicts to declare.

## 202   **References**

- 203   1     Plog BA and Nedergaard M. The glymphatic system in central nervous system health and  
204         disease: Past, present, and future. *Annu Rev Pathol.* 2018; 13: 379-94.
- 205   2     Iliff JJ, Lee H, Yu M et al. Brain-wide pathway for waste clearance captured by contrast-  
206         enhanced mri. *J Clin Invest.* 2013; 123(3): 1299-309.
- 207   3     Eide PK, Vatnehol SAS, Emblem KE et al. Magnetic resonance imaging provides  
208         evidence of glymphatic drainage from human brain to cervical lymph nodes. *Sci Rep.*  
209         2018; 8(1): 7194.
- 210   4     Nir Y, Andrillon T, Marmelshtein A et al. Selective neuronal lapses precede human  
211         cognitive lapses following sleep deprivation. *Nat Med.* 2017; 23(12): 1474-80.
- 212   5     van Enkhuizen J, Acheson D, Risbrough V et al. Sleep deprivation impairs performance  
213         in the 5-choice continuous performance test: Similarities between humans and mice.  
214         *Behav Brain Res.* 2014; 261: 40-8.
- 215   6     Killgore WD. Effects of sleep deprivation on cognition. *Prog Brain Res.* 2010; 185: 105-  
216         29.
- 217   7     Dawson D and Reid K. Fatigue, alcohol and performance impairment. *Nature.* 1997;  
218         388(6639): 235.
- 219   8     Lim J and Dinges DF. A meta-analysis of the impact of short-term sleep deprivation on  
220         cognitive variables. *Psychol Bull.* 2010; 136(3): 375-89.
- 221   9     Harrison Y and Horne JA. The impact of sleep deprivation on decision making: A  
222         review. *J Exp Psychol Appl.* 2000; 6(3): 236-49.
- 223   10    Walker MP and Stickgold R. Sleep, memory, and plasticity. *Annu Rev Psychol.* 2006; 57:  
224         139-66.

LONG WEEKEND SLEEP AND ACADEMIC PERFORMANCE

- 225 11 Okano K, Kaczmarzyk JR, Dave N et al. Sleep quality, duration, and consistency are  
226 associated with better academic performance in college students. *NPJ Sci Learn.* 2019; 4:  
227 16.
- 228 12 Lemma S, Berhane Y, Worku A et al. Good quality sleep is associated with better  
229 academic performance among university students in ethiopia. *Sleep Breath.* 2014; 18(2):  
230 257-63.
- 231 13 Maheshwari G and Shaukat F. Impact of poor sleep quality on the academic performance  
232 of medical students. *Cureus.* 2019; 11(4): e4357.
- 233 14 Zeek ML, Savoie MJ, Song M et al. Sleep duration and academic performance among  
234 student pharmacists. *Am J Pharm Educ.* 2015; 79(5): 63.
- 235 15 Stinebrickner TR and Stinebrickner R. *Journal of Labor Economics.* University of  
236 Chicago Press; 2012:707-48.
- 237

## 238 **Figure Captions**

239 **Figure 1. Demographic Data on First Professional Year Pharmacy Students at Duquesne**  
240 **University.** Pie charts of gender percentages (**A**), age (**B**), participation on an athletic team (**C**),  
241 transfer status (**D**), and commuter or campus resident status (**E**). Frequency histogram of GPAs  
242 (**F**).

243 **Figure 2. Longer durations of weekend sleep are associated with higher GPAs in pharmacy**  
244 **students.** Students in the first year of the professional-phase pharmacy program at Duquesne  
245 University were asked to closely monitor their sleep schedules, on a daily basis, for three weeks  
246 (Survey 1). (**A**) Hours of sleep on weekends were plotted against cumulative GPAs (acquired  
247 from the Dean's office, with signed permission from the student). Data are illustrated as violin  
248 plots. The number of participants per group is listed above the X axis. (**B**) Women had slightly  
249 higher cumulative GPAs than men. (**C**) Violin plots of cumulative GPA as a function of gender  
250 and hours of sleep per night on weekends. (**D-E**) Pearson correlation of GPAs with hours of  
251 sleep per weekend night in men or women. (**F**) Scatterplots of sleep inconsistency, defined as the  
252 average standard deviations of sleep duration per student across three weeks, as a function of  
253 gender. (**G**) Violin plots of professional-phase GPA, as a function of the number of minutes to  
254 fall asleep on weekdays. For bracketed comparisons, \*two-tailed  $p < 0.05$ ; \*\*two-tailed  $p < 0.01$ ;  
255 n.s. = not significant.

# Figure 1

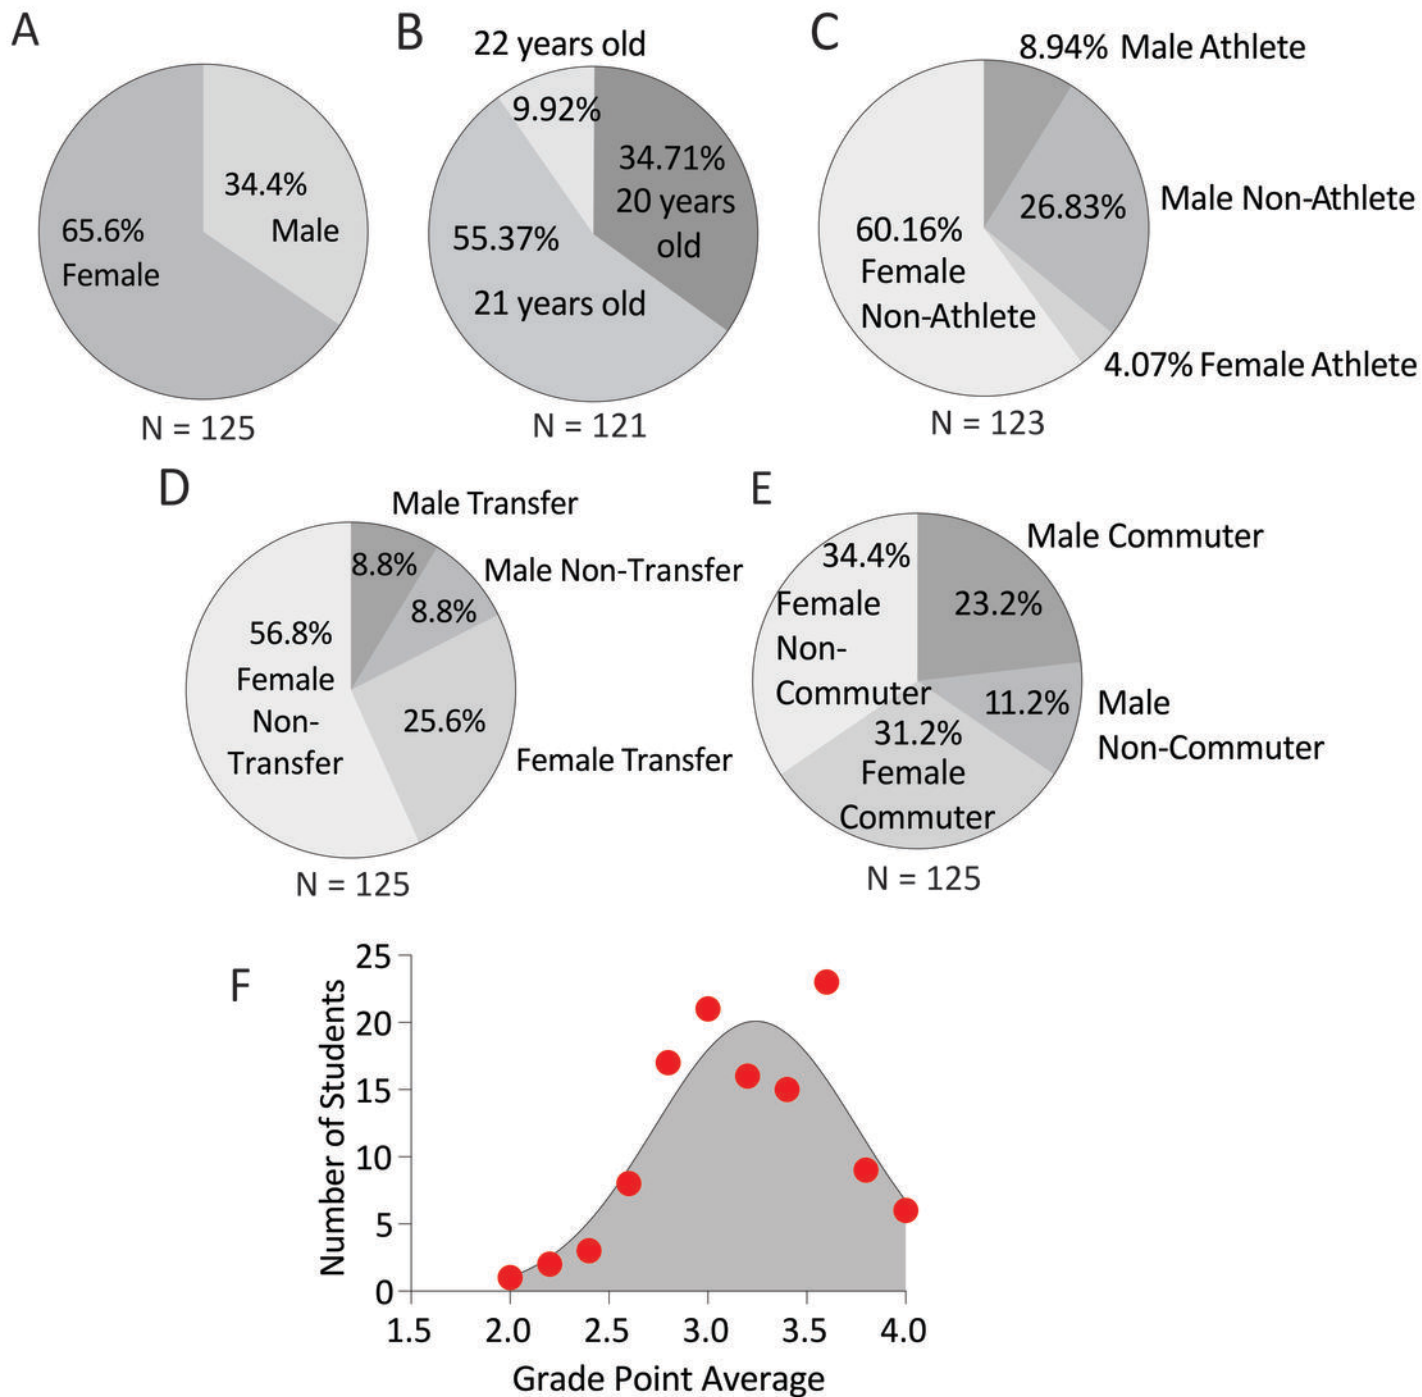

# Figure 2

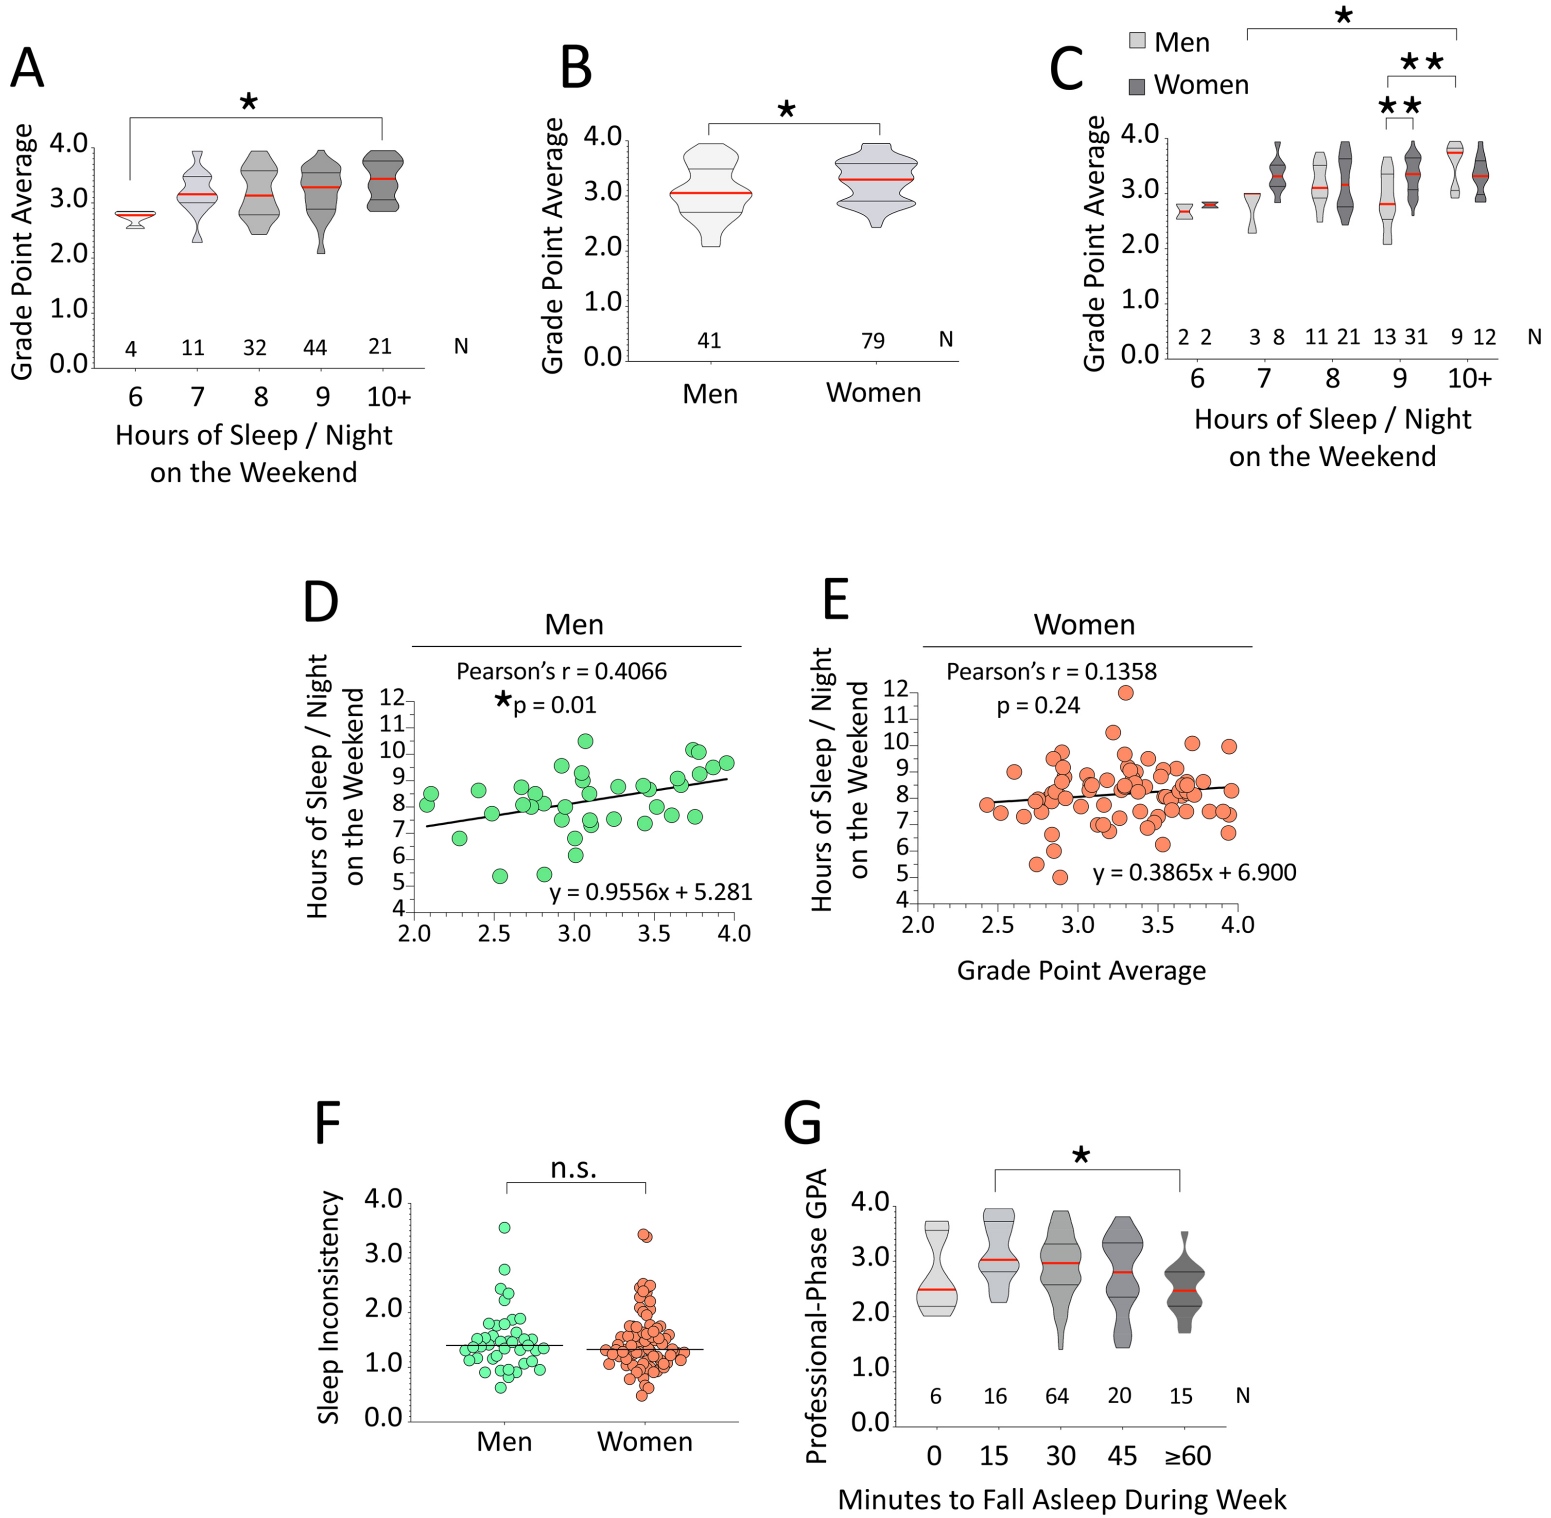

## Appendix 1:

### Survey One

(via Survey Monkey)

Question 1: What time did you go to bed?

Question 2: What time did you fall asleep?

Question 3: How many times did you wake up in the middle of the night? Why did you wake up?

Question 4: What time did you wake up in the morning?

Question 5: Did you feel refreshed within 30 minutes of waking up?



## Appendix 2:

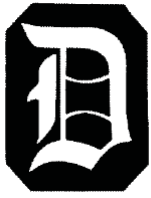

# DUQUESNE UNIVERSITY

600 FORBES AVENUE ♦ PITTSBURGH, PA 15282

### CONSENT TO PARTICIPATE IN A RESEARCH STUDY

|                            |                                                                                                                                                                                                                                                                                                                                                                              |
|----------------------------|------------------------------------------------------------------------------------------------------------------------------------------------------------------------------------------------------------------------------------------------------------------------------------------------------------------------------------------------------------------------------|
| <b>TITLE:</b>              | The Influence of Sleep Disruption on Academic Performance                                                                                                                                                                                                                                                                                                                    |
| <b>INVESTIGATOR:</b>       | Rehana K. Leak                                                                                                                                                                                                                                                                                                                                                               |
| <b>SOURCE OF SUPPORT:</b>  | This study is supported by the School of Pharmacy.                                                                                                                                                                                                                                                                                                                           |
| <b>PURPOSE:</b>            | You are being asked to participate in a research project that seeks to investigate the role of sleep and other factors on academic performance in the Pharm.D. program at Duquesne. We have collected detailed data from all students in the ABLE laboratories and would like to be able to disseminate and publish the deidentified, aggregate results in graphical format. |
| <b>RISKS AND BENEFITS:</b> | <b>There are no risks greater than those encountered in everyday life.</b>                                                                                                                                                                                                                                                                                                   |
| <b>COMPENSATION:</b>       | Participation in the project will require no monetary cost to you.                                                                                                                                                                                                                                                                                                           |
| <b>CONFIDENTIALITY:</b>    | Your name will never appear on any graph or publication. All written materials and consent forms will be stored in a locked file. Your response(s) will only appear in statistical data summaries. All materials will be destroyed at the completion of the research.                                                                                                        |
| <b>RIGHT TO WITHDRAW:</b>  | You are under no obligation to participate in this study. You are free to withdraw your consent to participate at any time.                                                                                                                                                                                                                                                  |
| <b>SUMMARY OF RESULTS:</b> | A summary of the significant results of this research will be supplied to you, at no cost, upon request, when the analyses are ready.                                                                                                                                                                                                                                        |

**VOLUNTARY CONSENT:**

I hereby allow all the data I entered into Survey Monkey in the ABLE labs and the paper surveys in HPP class to be analyzed for dissemination and publication. I additionally authorize data regarding my course grades and GPA to be analyzed for dissemination and publication. I understand that my data will only appear in aggregate form and that my identity will not be revealed in any publication or public format. I understand that my participation is voluntary and that I am free to withdraw my consent at any time, for any reason. On these terms, I certify that I am willing to participate in this research project.

I understand that if I have any further questions about my participation in this study, I may call Rehana Leak at 412.396.4734 and Dr. Paul Richer, Chair of the Duquesne University Institutional Review Board, at 412-396-6326.

---

|                        |                         |      |
|------------------------|-------------------------|------|
| Participant's Name     | Participant's Signature | Date |
|                        | Rehana Khan Leak        |      |
| Researcher's Signature | Researcher's name       | Date |

The following survey was stapled to this consent form, only for purposes of data entry, and then detached and stored separately to de-identify all the data

## Survey 2

### ANONYMOUS QUESTIONNAIRE

*Please do not add personal identifiers; this evaluation is entirely anonymous.*

Please circle one of the following choices

1. I often study late at night even though I am tired and it is hard to concentrate  
Strongly disagree ----- Strongly agree  
1                      2                      3                      4                      5
2. I can most readily understand difficult material at these times of day:  
Mornings (8 AM to noon)  
Afternoons (noon to 4 PM)  
Evenings (4 PM to 8 PM)  
Early Nighttime (8 PM to midnight)  
Late Nighttime (midnight to 4 AM)
3. During the week, I typically sleep the following hours if there is an exam the next day:  
4-5    5-6    6-7    7-8    8-9    9-10    10-11    11+
4. During the week, I typically sleep the following hours if I *don't* have any exam the next day:  
4-5    5-6    6-7    7-8    8-9    9-10    10-11    11+
5. During the weekend, if I don't have to get up early, I typically sleep the following hours:  
4-5    5-6    6-7    7-8    8-9    9-10    10-11    11+
6. Please add a comment about whether your sleep feels refreshing or you feel it is not sufficient:

7. My sleep is often interrupted by roommates or other sources of noise

Strongly disagree ----- Strongly agree

1                      2                      3                      4                      5

8. My current GPA is

2.5 or less                      2.51 – 3.0                      3.01 – 3.5                      3.51 – 3.70                      3.71 – 4.0

9. My grade in Dr. Meng’s exam in Human Physiology and Pathology was the following:

0-60%                      61-70%                      71-80%                      81-90%                      91-100%

10. My grade in Dr. Leak’s exam in Human Physiology and Pathology was the following:

0-60%                      61-70%                      71-80%                      81-90%                      91-100%

11. My age is

21 or below    22    23    24    25 or older

12. My gender is \_\_\_\_\_

13. I commute to school: Yes    No    (If the answer is “no,” skip to question 15)

14. My commute time is, on average, about \_\_\_\_\_ minutes

15. I prefer exams early, such as at 7:30 AM, rather than later in the day after other classes

Strongly disagree ----- Strongly agree

1                      2                      3                      4                      5

### Appendix 3:

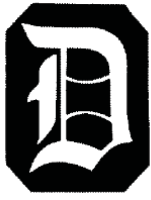

# DUQUESNE UNIVERSITY

600 FORBES AVENUE ♦ PITTSBURGH, PA 15282

## CONSENT TO PARTICIPATE IN A RESEARCH STUDY

|                            |                                                                                                                                                                                                                                                                                                                                                                              |
|----------------------------|------------------------------------------------------------------------------------------------------------------------------------------------------------------------------------------------------------------------------------------------------------------------------------------------------------------------------------------------------------------------------|
| <b>TITLE:</b>              | The Influence of Sleep Disruption on Academic Performance                                                                                                                                                                                                                                                                                                                    |
| <b>INVESTIGATOR:</b>       | Rehana K. Leak                                                                                                                                                                                                                                                                                                                                                               |
| <b>SOURCE OF SUPPORT:</b>  | This study is supported by the School of Pharmacy.                                                                                                                                                                                                                                                                                                                           |
| <b>PURPOSE:</b>            | You are being asked to participate in a research project that seeks to investigate the role of sleep and other factors on academic performance in the Pharm.D. program at Duquesne. We have collected detailed data from all students in the ABLE laboratories and would like to be able to disseminate and publish the deidentified, aggregate results in graphical format. |
| <b>RISKS AND BENEFITS:</b> | <b>There are no risks greater than those encountered in everyday life.</b>                                                                                                                                                                                                                                                                                                   |
| <b>COMPENSATION:</b>       | Participation in the project will require no monetary cost to you.                                                                                                                                                                                                                                                                                                           |
| <b>CONFIDENTIALITY:</b>    | Your name will never appear on any graph or publication. All written materials and consent forms will be stored in a locked file. Your response(s) will only appear in statistical data summaries. All materials will be destroyed at the completion of the research.                                                                                                        |
| <b>RIGHT TO WITHDRAW:</b>  | You are under no obligation to participate in this study. You are free to withdraw your consent to participate at any time.                                                                                                                                                                                                                                                  |
| <b>SUMMARY OF RESULTS:</b> | A summary of the significant results of this research will be supplied to you, at no cost, upon request, when the analyses are ready.                                                                                                                                                                                                                                        |

**VOLUNTARY CONSENT:**

I hereby allow all the data I entered into Survey Monkey in the ABE labs to be analyzed for dissemination and publication. I understand that my data will only appear in aggregate form and that my identity will not be revealed in any publication or public format. I understand that my participation is voluntary and that I am free to withdraw my consent at any time, for any reason. On these terms, I certify that I am willing to participate in this research project.

I understand that if I have any further questions about my participation in this study, I may call Rehana Leak at 412.396.4734 and Dr. Paul Richer, Chair of the Duquesne University Institutional Review Board, at 412-396-6326.

---

|                        |                         |      |
|------------------------|-------------------------|------|
| Participant's Name     | Participant's Signature | Date |
|                        | Rehana K. Leak          |      |
| Researcher's Signature | Researcher's name       | Date |

### Survey 3

1. Are you a transfer student?      Yes      No

2. Are you a commuter?      Yes      No

If yes, do you live:    Alone    With parents/family    With friends    With significant other

3. The area I live in is very noisy at night

Strongly disagree -----Strongly agree

1                      2                      3                      4                      5

4. Do you have roommates?    Yes    No

5. How many hours a day do you spend studying/doing homework when you don't have an exam?

\_\_\_\_\_ hours

6. How many hours a day do you spend studying/doing homework when you do have an exam?

\_\_\_\_\_ hours

7. How many days a week do you take naps? \_\_\_\_\_ days

8. When you take a nap, how long do you typically nap? \_\_\_\_\_ minutes

9. I usually feel refreshed after my nap

Strongly disagree -----Strongly agree

1                      2                      3                      4                      5

10. How many hours a week do you work? \_\_\_\_\_

11. How many credits are taking this semester? \_\_\_\_\_

12. Are you on an athletic team? \_\_\_\_\_

11. Do you agree to allow Dr. Leak access to your GPA and grades in other classes?

Yes

No

Signature: \_\_\_\_\_
